# Supplementary material
Source: MDPI journal article supplement (https://www.mdpi.com/2076-3417/13/22/12352)
Supplement: s1 [file s1]

# Experimental Evaluation of ND: YAG Laser Parameters and Sample Preparation Methods for Texturing Thin AISI 316L Steel Samples

Ewa Kozłowska <sup>1,\*</sup>, Sylwia Grabska-Zielińska <sup>2,\*</sup>

Table S1. The program code for the first modification path series carried out on AISI 316L samples

|    |           |
|----|-----------|
| 1  | G0 H4     |
| 2  | G04 T200  |
| 3  | G0 H3     |
| 4  | G91       |
| 5  | G36 D10   |
| 6  | G1 X10 F2 |
| 7  | G1 Y0.5   |
| 8  | G1 X-10   |
| 9  | G1 Y0.5   |
| 10 | G37 D-1   |
| 11 | G20 L5    |

Table S2. The program code for the increased modification area

|    |           |
|----|-----------|
| 1  | G0 H4     |
| 2  | G04 T200  |
| 3  | G0 H3     |
| 4  | G91       |
| 5  | G36 D10   |
| 6  | G1 X48 F2 |
| 7  | G1 Y2     |
| 8  | G1 X-48   |
| 9  | G1 Y2     |
| 10 | G37 D-1   |
| 11 | G20 L5    |
